# Supplementary material
Source: PubMed Central journal article supplement (PMC7894665)
Supplement: ASN.2020050697SupplementaryData.pdf [file ASN.2020050697SupplementaryData.pdf]

## **Supplemental Table of Contents**

### **Supplemental Table 1: S1P modulators currently in clinical trials**

## Supplemental Table 1: S1P modulators currently in clinical trials

| Drug name              | Target                              | Disease                                                                                           | Clinical Trial number                               | Phase   | Status                                |
|------------------------|-------------------------------------|---------------------------------------------------------------------------------------------------|-----------------------------------------------------|---------|---------------------------------------|
| ABC294640              | SPHK2 antagonist                    | Advanced solid tumors                                                                             | NCT01488513                                         | 1       | Completed                             |
| ABC294640              | SPHK2 antagonist                    | Refractory or relapsed multiple myeloma                                                           | NCT02757326                                         | 1b/2    | Terminated*                           |
| AC-058B201 / Ponesimod | S1PR1 agonist                       | Relapsing-remitting multiple sclerosis                                                            | NCT01093326                                         | 2       | Active                                |
| AC-058B201 / Ponesimod | S1PR1 agonist                       | Chronic GVHD                                                                                      | NCT02461134                                         | 2       | Terminated**                          |
| AC-058B201 / Ponesimod | S1PR1 agonist                       | Psoriasis                                                                                         | NCT01208090                                         | 2       | Completed                             |
| AC-058B201 / Ponesimod | S1PR1 agonist                       | Ponesimod vs teriflunomide in relapsing multiple sclerosis                                        | NCT02425644/NCT03232072                             | 3       | Completed/Active                      |
| ACT-128800             | S1PR1 agonist                       | Moderate to severe plaque psoriasis                                                               | NCT00852670 /NCT01208090                            | 2       | Completed                             |
| ACT-128800             | S1PR1 agonist                       | Relapsing-remitting multiple sclerosis                                                            | NCT01006265                                         | 2       | Completed                             |
| Amitriptyline          | ASM                                 | Cystic Fibrosis / Infection/ Pseudomonas Aeruginosa                                               | NCT00515229                                         | 2       | Completed                             |
| BAF312                 | S1PR1/R3 agonist                    | Renal impairment                                                                                  | NCT01904214                                         | 1       | Completed                             |
| Ceralifimod (ONO-4641) | S1PR1/5 agonist                     | Relapsing-remitting multiple sclerosis                                                            | NCT01081782                                         | 2       | Completed                             |
| Ceralifimod (ONO-4641) | S1PR1/5 agonist                     | Relapsing-remitting multiple sclerosis, Phase 2 extension                                         | NCT01226745                                         | 2       | Terminated***                         |
| CS-0777                | S1PR1 agonist                       | Multiple sclerosis                                                                                | NCT00616733                                         | 1       | Completed                             |
| FTY720                 | S1PR1/3/4/5 agonist                 | Acute Stroke                                                                                      | NCT02002390                                         | 2       | Completed                             |
| FTY720                 | S1PR1/3/4/5 agonist                 | Effect of FTY720 on pulmonary and cardiac function                                                | NCT00416845                                         | 1       | Completed                             |
| FTY720                 | S1PR1/3/4/5 agonist                 | Fingolimod Versus Dimethyl-fumarate in Multiple Sclerosis                                         | NCT03345940                                         | 4       | Terminated**                          |
| FTY720                 | S1PR1/3/4/5 agonist                 | Schizophrenia                                                                                     | NCT01779700                                         | 2       | Completed****                         |
| FTY720                 | S1PR1/3/4/5 agonist                 | Rett's Syndrome                                                                                   | NCT02061137                                         | 2       | Completed                             |
| FTY720                 | S1PR1/3/4/5 agonist                 | Primary progressive multiple sclerosis                                                            | NCT00731692                                         | 3       | Terminated****                        |
| FTY720                 | S1PR1/3/4/5 agonist                 | PK study in patients with severe renal impairment                                                 | NCT00731523                                         | 1       | Completed                             |
| FTY720                 | S1PR1/3/4/5 agonist                 | Moderate asthma                                                                                   | NCT00785083                                         | 2       | Completed                             |
| FTY720                 | S1PR1/3/4/5 agonist                 | Kidney Transplantation                                                                            | NCT00099801                                         | 3       | Completed                             |
| FTY720                 | S1PR1/3/4/5 agonist                 | Neurodegeneration                                                                                 | NCT02575365                                         | 4       | Terminated**                          |
| FTY720                 | S1PR1/3/4/5 agonist                 | COVID-19                                                                                          | NCT04280558                                         | 2       | Recruiting                            |
| GSK2018682             | S1PR1 agonist                       | Healthy Volunteers                                                                                | NCT01466322/ NCT01431937                            | 1       | Completed                             |
| KRP-203                | S1P1                                | Subacute cutaneous lupus erythematosus                                                            | NCT01294774                                         | 2       | Completed                             |
| KRP-203                | S1P1                                | Stem cell transplant in hematological malignancies                                                | NCT01830010                                         | 1       | Completed                             |
| MT-1303                | S1PR1 antagonist                    | Crohn's disease                                                                                   | NCT02148185/NCT02389790/<br>NCT02378688             | 2       | Completed                             |
| MT-1303                | S1PR1 antagonist                    | Relapsing-remitting multiple sclerosis                                                            | NCT02293967/NCT02310048/<br>NCT01890655/NCT01742052 | 1       | Completed                             |
| MT-1303                | S1PR1 antagonist                    | Plaque psoriasis                                                                                  | NCT01987843                                         | 2       | Completed                             |
| MT-1303                | S1PR1 antagonist                    | Inflammatory bowel disease                                                                        | NCT01666327                                         | 1       | Completed                             |
| MT-1303                | S1PR1 antagonist                    | Systemic Lupus Erythematosus                                                                      | NCT02307643                                         | 1       | Completed                             |
| Opaganip               | SPHK2 antagonist                    | COVID-19 Pneumonia                                                                                | NCT04414618                                         | 2       | Recruiting                            |
| Opaganip               | SPHK2 antagonist                    | COVID-19 Pneumonia                                                                                | NCT04467840                                         | 2/3     | Recruiting                            |
| Ozanimod (RPC1063)     | S1PR1/5 agonist                     | Multiple sclerosis                                                                                | NCT02797015/NCT02047734/<br>NCT04140305/NCT02294058 | 1/3/3/3 | Completed/Active/<br>Active/Completed |
| Ozanimod (RPC1063)     | S1PR1/5 agonist                     | Crohn's disease                                                                                   | NCT02531113                                         | 2       | Completed                             |
| Ozanimod (RPC1063)     | S1PR1/5 agonist                     | Ulcerative colitis                                                                                | NCT02531126                                         | 3       | Active                                |
| Siponimod (BAF312)     | S1PR1/5 agonist                     | Secondary progressive multiple sclerosis                                                          | NCT01665144/NCT02330965                             | 3/3     | Active/Completed                      |
| Siponimod (BAF312)     | S1PR1/5 agonist                     | Relapsing-remitting multiple sclerosis                                                            | NCT00879658/NCT01185821                             | 2       | Completed                             |
| Siponimod (BAF312)     | S1PR1/5 agonist                     | Intracerebral Hemorrhage                                                                          | NCT03338998                                         | 2       | Temporary<br>Suspension               |
| Siponimod (BAF312)     | S1PR1/5 agonist                     | Polymyositis                                                                                      | NCT01801917                                         | 2       | Terminated****                        |
| Siponimod (BAF312)     | S1PR1/5 agonist                     | Active dermatomyositis                                                                            | NCT02029274                                         | 2       | Terminated*****                       |
| Siponimod (BAF312)     | S1PR1/5 agonist                     | Active dermatomyositis/Polymyositis                                                               | NCT01148810                                         | 2       | Terminated**                          |
| Siponimod (BAF312)     | S1PR1/5 agonist                     | Hepatic impairment                                                                                | NCT01565902                                         | 1       | Completed                             |
| Siponimod (BAF312)     | S1PR1/5 agonist                     | Renal impairment                                                                                  | NCT01904214                                         | 1       | Completed                             |
| Sonepcizumab/LT1009    | Human Anti-S1P recombinant antibody | Exudative Age-related Macular Degeneration                                                        | NCT01414153                                         | 2       | Completed                             |
| Sonepcizumab/LT1009    | Human Anti-S1P recombinant antibody | Renal Cell Carcinoma                                                                              | NCT01762033                                         | 2       | Terminated                            |
| Sonepcizumab/LT1009    | Human Anti-S1P recombinant antibody | Neovascular Age-related Macular Degeneration                                                      | NCT00767949                                         | 1       | Unknown                               |
| Sonepcizumab/LT1009    | Human Anti-S1P recombinant antibody | Exudative Age-Related Macular Degeneration (AMD) or Polypoidal Choroidal Vasculopathy (PCV) (PED) | NCT01334255                                         | 1       | Terminated*****                       |
| Sonepcizumab/LT1009    | Human Anti-S1P recombinant antibody | Neovascular Age-related Macular Degeneration                                                      | NCT00767949                                         | 1A      | Unknown                               |
| Sonepcizumab/LT1009    | Human Anti-S1P recombinant antibody | Solid Tumors                                                                                      | NCT00661414                                         | 1       | Completed                             |
| Sonepcizumab/LT1009    | Human Anti-S1P recombinant antibody | Persistent Pigment Epithelial Detachment (PED)                                                    | NCT01334255                                         | 1       | Terminated*****                       |

\* Expiration of NCI funding, \*\* low recruitment, \*\*\* Merck decided not to pursue Phase 3 development, \*\*\*\* Study results available, \*\*\*\*\* no evidence of efficacy, \*\*\*\*\* by sponsor decision
